# Supplementary material for: Behavioural Analysis of Dogs’ Response to Threatening and Neutral Conspecific Video Stimuli
Source: MDPI journal article supplement (doi:10.3390/app13169254), 2023-08-15
Supplement: s1 [file s1]

## Supplemental Material - Video study

**Figure S1** – Possible orders of presentations of the stimuli

| ORDER OF PRESENTATION | 1st stimulus          | 2nd stimulus          | 3rd stimulus          | 4th stimulus          |
|-----------------------|-----------------------|-----------------------|-----------------------|-----------------------|
| 1                     | Dog1Threatening (D1T) | Dog1Neutral (D1N)     | Dog2Threatening (D2T) | Dog2Neutral (D2N)     |
| 2                     | Dog1Neutral (D1N)     | Dog1Threatening (D1T) | Dog2Neutral (D2N)     | Dog2Threatening (D2T) |
| 3                     | Dog2Threatening (D2T) | Dog2Neutral (D2N)     | Dog1Neutral (D1N)     | Dog1Threatening (D1T) |
| 4                     | Dog2Neutral (D2N)     | Dog2Threatening (D2T) | Dog1Neutral (D1N)     | Dog1Threatening (D1T) |

**Table S1** – List of the subjects who participated in the study, sex, age and order of exposure of the stimuli (N= audio natural, A= audio artificial).

| subject  | age | breed                 | sex | neutered | order       |
|----------|-----|-----------------------|-----|----------|-------------|
| Sunny    | 1   | Viszla                | F   | no       | 3N-3A-2A-2N |
| Pan      | 7   | Cocker spaniel        | F   | yes      | 4A-4N-1N-1A |
| Kobe     | 1.5 | Flat coated retriever | M   | no       | 1N-1A-4A-4N |
| Amelia   | 5   | Weimaraner            | F   | no       | 2N-2A-3A-3N |
| Aki      | 5   | Pit bull mix          | M   | yes      | 1A-1N-4N-4A |
| Aron     | 3   | Rhodesian ridgeback   | M   | no       | 3N-3A-2A-2N |
| Sibilla  | 1   | Weimaraner            | F   | no       | 4N-4A-1A-1N |
| Benny    | 3   | English Pointer       | M   | yes      | 3A-3N-2N-2A |
| Lucky    | 1   | Mix breed             | M   | no       | 2A-2N-3N-3A |
| Stella   | 2   | Weimaraner            | F   | yes      | 4A-4N-1N-1A |
| Bella    | 6   | Kurzhaar              | F   | yes      | 1N-1A-4A-4N |
| Ali      | 3   | Kurzhaar              | M   | yes      | 2N-2A-3A-3N |
| Kappa    | 1   | Mix breed             | F   | yes      | 1A-1N-4N-4A |
| Kaspjian | 1.5 | Doberman              | M   | no       | 4N-4A-1A-1N |
| Pepo     | 4   | Mix breed             | M   | no       | 3A-3N-2N-2A |
| Dylan    | 12  | Labrador retriever    | M   | no       | 2A-2N-3N-3A |
| Uma      | 4   | Rhodesian ridgeback   | F   | yes      | 4A-4N-1N-1A |
| Lea1     | 11  | Mix breed             | F   | yes      | 1N-1A-4A-4N |
| Junior   | 4   | Labrador retriever    | M   | yes      | 2N-2A-3A-3N |
| Eve      | 9   | Labrador retriever    | F   | yes      | 1A-1N-4N-4A |
| Sole     | 3   | Weimaraner            | F   | yes      | 4N-4A-1A-1N |
| Buddy    | 11  | Mix breed             | M   | yes      | 3A-3N-2N-2A |
| Luna     | 11  | Mix breed             | F   | yes      | 2A-2N-3N-3A |
| Cheube   | 3   | Lagotto Romagnolo     | M   | no       | 3N-3A-2A-2N |
| Belen    | 6   | German Shepherd       | F   | yes      | 4A-4N-1N-1A |

|         |     |                        |   |     |             |
|---------|-----|------------------------|---|-----|-------------|
| Chico   | 7.5 | German Shepherd        | M | no  | 1N-1A-4A-4N |
| Gus     | 1   | Mix Breed              | M | yes | 2N-2A-3A-3N |
| Indi    | 10  | Border Collie          | F | yes | 1A-1N-4N-4A |
| Nera    | 2   | Mix breed              | F | no  | 4N-4A-1A-1N |
| Olmo    | 3   | Maremmano              | M | no  | 3A-3N-2N-2A |
| Oliver  | 3   | Weimaraner             | M | no  | 2A-2N-3N-3A |
| Nervo   | 8   | Belgian Malinois       | M | yes | 3N-3A-2A-2N |
| Berta   | 7   | Dobermann              | F | no  | 3N-3A-2A-2N |
| Ska     | 9   | Mix breed              | F | yes | 4A-4N-1N-1A |
| Lou     | 5.5 | Cocker spaniel         | F | yes | 1N-1A-4A-4N |
| Lilly   | 2   | Pit bull terrier       | F | yes | 2N-2A-3A-3N |
| Lea     | 3   | Mix brreed             | F | yes | 1A-1N-4N-4A |
| Lana    | 10  | Lupina del Gigante     | F | yes | 4N-4A-1A-1N |
| Sky     | 2   | Border Collie          | F | yes | 3A-3N-2N-2A |
| Leo     | 5   | Lupino del Gigante     | M | no  | 2A-2N-3N-3A |
| Ziggy   | 7   | mix Schnauzer          | F | yes | 3N-3A-2A-2N |
| Tabù    | 1   | working cocker spaniel | M | no  | 3N-3A-2A-2N |
| Olympia | 5   | Rhodesian ridgeback    | F | yes | 4A-4N-1N-1A |
| Nino    | 7   | Mix breed              | M | no  | 1N-1A-4A-4N |
| Marta   | 10  | Mix breed              | F | yes | 2N-2A-3A-3N |
| Tilde   | 5   | Pastore del Lagorai    | F | yes | 1A-1N-4N-4A |
| Ugo     | 10  | Flat Coated Retriever  | M | no  | 4N-4A-1A-1N |
| Attila  |     | Australian Sheperd     | M | no  | 3A-3N-2N-2A |
| Quickly | 3   | Border collie          | M | no  | 2A-2N-3N-3A |
| Fiamma  | 3   | Vizsla                 | F | yes | 3N-3A-1A-1N |
| Biagio  | 2   | Weimaraner             | M | no  | 3N-3A-2A-2N |
| Mabelle | 1   | Rhodesian Ridgeback    | F | no  | 4A-4N-1N-1A |
| Penny   | 4   | German Shepherd        | F | yes | 1N-1A-4A-4N |
| Milo    | 4   | German Shepherd        | M | no  | 2N-2A-3A-3N |
| Marek   | 5.5 | German Shepherd        | M | no  | 1A-1N-4N-4A |
| Sally   | 7   | German Shepherd        | F | yes | 3N-3A-2A-2N |

**Table S2** – DogFACS ethogram for the coding of facial related movements.

| Category<br>(mutually<br>excludesve<br>behaviours) | Code           | Definition | Description                                                                                                                                                                                                                                                                                       | Type of<br>measure |
|----------------------------------------------------|----------------|------------|---------------------------------------------------------------------------------------------------------------------------------------------------------------------------------------------------------------------------------------------------------------------------------------------------|--------------------|
| ACTION<br>UNITS (AU)                               | AU145<br>(R-L) | Blink      | Upper and lower eyelids move towards together until they completely touch each other when the eyes close completely. In the AU145 <b>eyes open again within half a second</b> . The left and right eye can be closed independently (lateralized movement) (AU145-R, AU145-L) or together (AU145). | Event              |
|                                                    | AD126          | Panting    | Tongue's shown, the lower jaw is dropped and there is no sign of tension.<br>The dog breathes quickly and noisily through its mouth, while its chest moves rapidly.                                                                                                                               | Duration           |
| ACTION<br>DESCRIPTORS<br>(AD)                      | AD137          | Nose lick  | The jaw is lowered and the tongue licks the nose. It can be followed by a AD37 but they should be coded separately.                                                                                                                                                                               | Event              |
|                                                    | AD126          | Panting    | Tongue's shown, the lower jaw is dropped and there is no sign of tension.<br>The dog breathes quickly and noisily through its mouth, while its chest moves rapidly.                                                                                                                               | Duration           |

|                                     |                  |                                                         |                                                                                                                                                                                                                                                       |          |
|-------------------------------------|------------------|---------------------------------------------------------|-------------------------------------------------------------------------------------------------------------------------------------------------------------------------------------------------------------------------------------------------------|----------|
|                                     | AD37<br>(L or R) | Lip wipe<br>(Lips licking)<br>(lateralized<br>movement) | The tongue wipes the lips from the mouth midpoint till the mouth corner. This movement is usually lateralized ( <b>AD37-R</b> or <b>AD37-L</b> ). If the tongue is licking the lips just at the midpoint code as <b>AD37</b> .                        | Event    |
| EAR ACTION<br>DESCRIPTORS<br>(EADs) | EAD101           | Ears Forward                                            | The ears are turned or pushed forward (rostrally). In dogs with pricked ears the pinna becomes rigid and tense. In dogs with floppy ears the base of the pinna is raised and pulled forward. Wrinkles may be formed along the midline frontal region. | Duration |
|                                     | EAD102           | Ears Adductor                                           | The ears are adducted, the base of the pinnae become closer together, by being pulled towards the head midline. The distance between the ears decreases. A vertical wrinkle may appear on the frontal region.                                         | Duration |
|                                     | EAD103           | Ears Flatteners                                         | Ears are pulled caudally, being flattened against the head. The pinna is pulled caudally, in the direction of the back of the head. In a frontal profile, the ears may disappear from the view.                                                       | Duration |
|                                     | EAD104<br>(R-L)  | Ears Rotator<br>(lateralized<br>movement)               | The ears are rotated laterally and externally. Dog can rotate both ears (EAD104) or just one of them (EAD104 L or R). The internal part of the pinna is twisted out and outward-looking.                                                              | Duration |

|  |        |                  |                                                                                                                                                                                                                            |          |
|--|--------|------------------|----------------------------------------------------------------------------------------------------------------------------------------------------------------------------------------------------------------------------|----------|
|  | EAD105 | Ears<br>Downward | The ears are pulled ventrally, laterally. The base of the pinna in both ears moves away from each other. The distance between the ears increases. The frontal region skin is stretched and the head takes a rounder shape. | Duration |
|--|--------|------------------|----------------------------------------------------------------------------------------------------------------------------------------------------------------------------------------------------------------------------|----------|

**Table S3** – General behaviours ethogram for the coding of other general movements.

| General Category        | Behavior             | Description                                                                                                                                                           | Type of measure |
|-------------------------|----------------------|-----------------------------------------------------------------------------------------------------------------------------------------------------------------------|-----------------|
| Position                | Stand                | The dog stand with all four paws on the ground and does not move.                                                                                                     | Duration        |
|                         | Sit                  | Stationary position, with only the backside in contact with the ground.                                                                                               | Duration        |
|                         | Lay                  | Dog's belly touches the ground as it lays completely down on the floor.                                                                                               | Duration        |
| Looking                 | Video                | The dog keeps its head oriented towards the video screen.                                                                                                             | Duration        |
|                         | Owner                | The head of the dog is directed towards the owner.                                                                                                                    | Duration        |
|                         | Room                 | The head of the dog is directed somewhere in the room that is not the owner or the video projector (es. Door, floor)                                                  | Duration        |
| Displacement behaviours | Autogrooming         | The dog starts licking and wiping its own body in order to clean it.                                                                                                  | Duration        |
|                         | Drinking             | Whenever the dog starts drinking water from the bowl.                                                                                                                 | Duration        |
|                         | Head_turn            | The dog is looking at the stimuli window or at the experimenter (in FH) and averts its gaze moving the head towards the right or the left.                            | Event           |
|                         | Paw lifting          | The dog lifts one of the front paws, even slightly.                                                                                                                   | Duration        |
|                         | Scratching           | The dog scratches repeatedly its neck or face with the hind legs.                                                                                                     | Duration        |
|                         | Shaking              | Dog's whole body and head starts moving rapidly, from side to side.                                                                                                   | Event           |
|                         | Sniffing Environment | Dog's muzzle gets closer to the floor, the exit room, or other items inside the experimental room, while its nose snuffles it and nostrils moves quickly.             | Duration        |
|                         | Stretching           | The whole body is stretched in various ways: forelegs may be leant down while the dog's back is arched; hind legs may be straightened while the head is held up high. | Event           |

|               |       |                                                                                                                                         |          |
|---------------|-------|-----------------------------------------------------------------------------------------------------------------------------------------|----------|
| Vocalizations | Whine | The dog starts vocalizing, making persistently whines.                                                                                  | duration |
|               | Growl | Snarling sound directed at something or as a reaction to something in the living environment. Mouth may be open; nose can be wrinckled. | duration |
|               | Bark  | Loud and short typical vocalization, which may be repetitive.                                                                           | duration |

**Table S4** – Results for the model of the behavioral variable looking at the video.  
Reference level for the factor condition (neutral), reference level for the factor audio (control).

Model with the three-way interaction condition\*audio\*stimulus\_id

```
> full.lookvideo=lmer(duration ~ condition * audio * stimulus_id + age + sex + session + (1|subject),
data=lookingvideo_data)
```

```
> null.lookvideo=lmer(duration ~ condition * audio + stimulus_id + age + sex + session + (1|subject),
data=lookingvideo_data)
```

|                | df | AIC      | BIC      | logLik    | deviance | Chisq | Df | Pr(>Chisq) |
|----------------|----|----------|----------|-----------|----------|-------|----|------------|
| null.lookvideo | 10 | 3919.821 | 3967.677 | -1949.911 | 3899.821 | NA    | NA | NA         |
| full.lookvideo | 13 | 3922.462 | 3984.674 | -1948.231 | 3896.462 | 3.359 | 3  | 0.339      |

|                             | df | AIC      | LRT    | Pr(Chi) |
|-----------------------------|----|----------|--------|---------|
| <none>                      | NA | 3922.462 | NA     | NA      |
| age                         | 1  | 3921.347 | 0.885  | 0.347   |
| sex                         | 1  | 3922.942 | 2.480  | 0.115   |
| session                     | 1  | 3973.997 | 53.535 | 0.000   |
| condition:audio:stimulus_id | 1  | 3920.962 | 0.500  | 0.479   |

```
> #model
```

```
> full.lookvideo=lmer(duration ~ condition * audio + stimulus_id + age + sex + session + (1|subject),
data=lookingvideo_data)
```

```
> null.lookvideo=lmer(duration ~ condition + audio + stimulus_id + age + sex + session + (1|subject),
data=lookingvideo_data)
```

```
> summary(full.lookvideo)
```

|                | df | AIC      | BIC      | logLik    | deviance | Chisq | Df    | Pr(>Chisq) |
|----------------|----|----------|----------|-----------|----------|-------|-------|------------|
| null.lookvideo | 9  | 3920.842 | 3963.912 | -1951.421 | 3902.842 | NA    | NA    | NA         |
| full.lookvideo | 10 | 3919.821 | 3967.677 | -1949.911 | 3899.821 | 3.021 | 1.000 | 0.082      |

|                 | df | AIC      | LRT    | Pr(Chi) |
|-----------------|----|----------|--------|---------|
| <none>          | NA | 3919.821 | NA     | NA      |
| stimulus_id     | 1  | 3917.971 | 0.150  | 0.699   |
| age             | 1  | 3918.706 | 0.885  | 0.347   |
| sex             | 1  | 3920.286 | 2.465  | 0.116   |
| session         | 1  | 3971.155 | 53.334 | 0.000   |
| condition:audio | 1  | 3920.842 | 3.021  | 0.082   |

```
> #model
```

```
> full.lookvideo=lmer(duration ~ condition * stimulus_id +audio + age + sex + sessione + (1|subject),
data=lookingvideo_data)
```

```
> null.lookvideo=lmer(duration ~ condition + audio + stimulus_id + age + sex + sessione + (1|subject),
data=lookingvideo_data)
```

```
> summary(full.lookvideo)
```

|                | npar | AIC      | BIC      | logLik    | deviance | Chisq | Df    | Pr(>Chisq) |
|----------------|------|----------|----------|-----------|----------|-------|-------|------------|
| null.lookvideo | 9    | 3920.842 | 3963.912 | -1951.421 | 3902.842 | NA    | NA    | NA         |
| full.lookvideo | 10   | 3921.784 | 3969.640 | -1950.892 | 3901.784 | 1.058 | 1.000 | 0.304      |

|        | npar | AIC      | LRT   | Pr(Chi) |
|--------|------|----------|-------|---------|
| <none> | NA   | 3921.784 | NA    | NA      |
| audio  | 1    | 3925.641 | 5.857 | 0.016   |

|                       |   |          |        |       |
|-----------------------|---|----------|--------|-------|
| age                   | 1 | 3920.668 | 0.883  | 0.347 |
| sex                   | 1 | 3922.267 | 2.482  | 0.115 |
| session               | 1 | 3973.015 | 53.230 | 0.000 |
| condition:stimulus_id | 1 | 3920.842 | 1.058  | 0.304 |

|             | npar | AIC      | LRT     | Pr(Chi) |
|-------------|------|----------|---------|---------|
| <none>      | NA   | 3920.842 | NA      | NA      |
| condition   | 1    | 4057.709 | 138.867 | 0.000   |
| stimulus_id | 1    | 3918.994 | 0.151   | 0.697   |
| audio       | 1    | 3924.684 | 5.842   | 0.016   |
| age         | 1    | 3919.725 | 0.883   | 0.347   |
| sex         | 1    | 3921.316 | 2.474   | 0.116   |
| session     | 1    | 3972.022 | 53.180  | 0.000   |

|                       | Estimate | Std. Error | t-value | Lower CI | Upper CI | min    | max    |
|-----------------------|----------|------------|---------|----------|----------|--------|--------|
| (Intercept)           | 3.501    | 0.401      | 8.734   | 2.718    | 4.272    | 3.318  | 3.648  |
| Condition threatening | 1.716    | 0.140      | 12.271  | 1.416    | 1.986    | 1.685  | 1.775  |
| stimulus_id D1        | 0.054    | 0.140      | 0.387   | -0.220   | 0.322    | 0.018  | 0.090  |
| Audio Natural         | 0.338    | 0.140      | 2.414   | 0.067    | 0.616    | 0.274  | 0.383  |
| age                   | -0.053   | 0.057      | -0.919  | -0.166   | 0.059    | -0.083 | -0.015 |
| Sex male              | -0.546   | 0.353      | -1.547  | -1.231   | 0.190    | -0.679 | -0.436 |
| Session session2      | -1.034   | 0.140      | -7.391  | -1.305   | -0.759   | -1.099 | -0.975 |

Conditional R2: 0.373  
Marginal R2: 0.163



**Table S5** - Results for the model of the behavioral EAD101 – Ears Forward.

|             | df | AIC      | LRT    | Pr(Chi) |
|-------------|----|----------|--------|---------|
| <none>      | NA | 3858.513 | NA     | NA      |
| condition   | 1  | 3882.521 | 26.008 | 0.000   |
| audio       | 1  | 3858.137 | 1.623  | 0.203   |
| age         | 1  | 3858.704 | 2.191  | 0.139   |
| sex         | 1  | 3857.841 | 1.328  | 0.249   |
| Session     | 1  | 3952.544 | 96.031 | 0.000   |
| stimulus_id | 1  | 3857.327 | 0.814  | 0.367   |

|                      | Estimate | Std. Error | value  | Lower CI | Upper CI | min    | max    |
|----------------------|----------|------------|--------|----------|----------|--------|--------|
| (Intercept)          | 2.40532  | 0.576      | 4.178  | 1.251    | 3.582    | 2.158  | 2.568  |
| Stimulus threatening | 0.670    | 0.131      | 5.128  | 0.388    | 0.929    | 0.633  | 0.708  |
| Audio Normal         | 0.167    | 0.131      | 1.272  | -0.084   | 0.414    | 0.114  | 0.214  |
| age                  | 0.125    | 0.086      | 1.454  | -0.057   | 0.303    | 0.097  | 0.175  |
| sexm                 | -0.592   | 0.525      | -1.127 | -1.613   | 0.454    | -0.737 | -0.434 |
| Session session 2    | -1.317   | 0.131      | 10.059 | -1.544   | -1.066   | -1.408 | -1.222 |
| stimulus_id D1       | -0.118   | 0.131      | -0.901 | -0.377   | 0.129    | -0.151 | -0.088 |

Conditional R2: 0.538

Marginal R2: 0.099

**Table S6** - Results for the model of the behavioral EAD102 – Ears Adductor.

|          | df | AIC      | LRT   | Pr(Chi) |
|----------|----|----------|-------|---------|
| <none>   | NA | 3933.218 | NA    | NA      |
| stimulus | 1  | 3931.717 | 0.499 | 0.480   |

|             |   |          |       |       |
|-------------|---|----------|-------|-------|
| audio       | 1 | 3931.225 | 0.007 | 0.932 |
| age         | 1 | 3933.344 | 2.126 | 0.145 |
| sex         | 1 | 3933.452 | 2.234 | 0.135 |
| session     | 1 | 3937.547 | 6.330 | 0.012 |
| stimulus_id | 1 | 3931.710 | 0.493 | 0.482 |

|                      | Estimate | Std. Error | t-value | Lower CI | Upper CI | min    | max    |
|----------------------|----------|------------|---------|----------|----------|--------|--------|
| (Intercept)          | 1.82606  | 0.483      | 3.785   | 0.822    | 2.775    | 1.543  | 1.993  |
| stimulus threatening | -0.098   | 0.138      | -0.706  | -0.353   | 0.187    | -0.145 | -0.046 |
| Audio Normal         | 0.012    | 0.139      | 0.084   | -0.256   | 0.306    | -0.062 | 0.052  |
| age                  | -0.101   | 0.071      | -1.432  | -0.242   | 0.033    | -0.138 | -0.074 |
| sexm                 | 0.636    | 0.433      | 1.468   | -0.208   | 1.479    | 0.521  | 0.814  |
| Session Session 2    | 0.348    | 0.139      | 2.512   | 0.074    | 0.614    | 0.269  | 0.433  |
| stimulus_id D1       | 0.097    | 0.138      | 0.701   | -0.159   | 0.377    | 0.067  | 0.143  |

Conditional R2: 0.379

Marginal R2: 0.037

**Table S7** - Results for the model of the behavioral EAD103 – Ears Flattener.

|           | df | AIC      | LRT   | Pr(Chi) |
|-----------|----|----------|-------|---------|
| <none>    | NA | 2745.138 | NA    | NA      |
| condition | 1  | 2745.982 | 2.844 | 0.092   |
| audio     | 1  | 2750.822 | 7.683 | 0.006   |
| age       | 1  | 2745.691 | 2.553 | 0.110   |
| sex       | 1  | 2749.440 | 6.302 | 0.012   |
| Session   | 1  | 2751.392 | 8.254 | 0.004   |

|             |   |          |       |       |
|-------------|---|----------|-------|-------|
| stimulus_id | 1 | 2743.146 | 0.008 | 0.930 |
|-------------|---|----------|-------|-------|

|                       | Estimate | Std. Error | value  | Lower CI | Upper CI | min    | max    |
|-----------------------|----------|------------|--------|----------|----------|--------|--------|
| (Intercept)           | 0.395    | 0.197      | 2.009  | 0.011    | 0.757    | 0.299  | 0.424  |
| Condition threatening | -0.121   | 0.072      | -1.684 | -0.248   | 0.018    | -0.142 | -0.079 |
| Audio Natural         | -0.200   | 0.072      | -2.772 | -0.341   | -0.057   | -0.225 | -0.150 |
| age                   | -0.044   | 0.028      | -1.572 | -0.095   | 0.012    | -0.051 | -0.026 |
| sexm                  | 0.432    | 0.172      | 2.513  | 0.090    | 0.776    | 0.321  | 0.460  |
| Session Session 2     | 0.207    | 0.072      | 2.873  | 0.070    | 0.352    | 0.147  | 0.236  |
| stimulus_id D1        | 0.006    | 0.072      | 0.087  | -0.136   | 0.149    | -0.020 | 0.044  |

Conditional R2: 0.272

Marginal R2: 0.060

**Table S8** – Results for the model EAD104 – Ears Rotator.

|             | df | AIC      | LRT    | Pr(Chi) |
|-------------|----|----------|--------|---------|
| <none>      | NA | 4018.283 | NA     | NA      |
| condition   | 1  | 4025.500 | 9.218  | 0.002   |
| audio       | 1  | 4016.784 | 0.502  | 0.479   |
| age         | 1  | 4016.850 | 0.567  | 0.451   |
| sex         | 1  | 4017.470 | 1.187  | 0.276   |
| Session     | 1  | 4033.560 | 17.277 | 0.000   |
| stimulus_id | 1  | 4017.028 | 0.746  | 0.388   |

|             | Estimate | Std. Error | t-value | Lower CI | Upper CI | min   | max   |
|-------------|----------|------------|---------|----------|----------|-------|-------|
| (Intercept) | 1.66918  | 0.377      | 4.430   | 0.923    | 2.391    | 1.447 | 1.779 |

|                       |        |       |        |        |        |        |        |
|-----------------------|--------|-------|--------|--------|--------|--------|--------|
| Condition threatening | -0.399 | 0.131 | -3.038 | -0.645 | -0.154 | -0.444 | -0.358 |
| Audio Natural         | -0.093 | 0.132 | -0.706 | -0.341 | 0.179  | -0.125 | -0.040 |
| age                   | 0.040  | 0.054 | 0.735  | -0.061 | 0.149  | 0.029  | 0.064  |
| sexm                  | -0.353 | 0.332 | -1.064 | -0.970 | 0.269  | -0.487 | -0.211 |
| Session Session 2     | 0.549  | 0.132 | 4.170  | 0.291  | 0.810  | 0.478  | 0.619  |
| stimulus_id D1        | 0.114  | 0.132 | 0.864  | -0.131 | 0.360  | 0.071  | 0.148  |

Conditional R2: 0.266

Marginal R2: 0.031

**Table S9** – Results for the model EAD105 – Ears Downward.

|             | df | AIC      | LRT   | Pr(Chi) |
|-------------|----|----------|-------|---------|
| <none>      | NA | 2500.305 | NA    | NA      |
| condition   | 1  | 2502.138 | 3.833 | 0.050   |
| audio       | 1  | 2498.331 | 0.026 | 0.872   |
| age         | 1  | 2498.429 | 0.124 | 0.725   |
| sex         | 1  | 2498.573 | 0.269 | 0.604   |
| Session     | 1  | 2499.927 | 1.623 | 0.203   |
| stimulus_id | 1  | 2498.373 | 0.069 | 0.793   |

|                       | Estimate | Std. Error | value  | Lower CI | Upper CI | min    | max    |
|-----------------------|----------|------------|--------|----------|----------|--------|--------|
| (Intercept)           | 0.394    | 0.149      | 2.653  | 0.116    | 0.700    | 0.325  | 0.497  |
| condition threatening | -0.124   | 0.063      | -1.955 | -0.242   | 0.003    | -0.143 | -0.100 |
| Audio Natural         | -0.010   | 0.064      | -0.161 | -0.132   | 0.114    | -0.033 | 0.014  |
| age                   | -0.007   | 0.021      | -0.344 | -0.048   | 0.032    | -0.020 | -0.002 |

|                      |        |       |        |        |       |        |        |
|----------------------|--------|-------|--------|--------|-------|--------|--------|
| sexm                 | -0.064 | 0.126 | -0.505 | -0.323 | 0.184 | -0.114 | -0.013 |
| Session<br>Session 2 | 0.081  | 0.064 | 1.271  | -0.040 | 0.207 | 0.045  | 0.106  |
| stimulus_id D1       | -0.017 | 0.063 | -0.261 | -0.139 | 0.107 | -0.047 | 0.029  |

Conditional R2: 0.161

Marginal R2: 0.007

**Table S10** – Results for the model AU145 – Blink

|                   | df | AIC      | LRT    | Pr(Chi) |
|-------------------|----|----------|--------|---------|
| <none>            | NA | 1363.231 | NA     | NA      |
| age               | 1  | 1361.551 | 0.321  | 0.571   |
| sex               | 1  | 1362.090 | 0.859  | 0.354   |
| Session           | 1  | 1377.200 | 15.970 | 0.000   |
| stimulus_id       | 1  | 1361.237 | 0.007  | 0.934   |
| Condition : audio | 1  | 1366.439 | 5.208  | 0.022   |

|                                       | Estimate | Std. Error | t-value | Pr(> z ) | Lower CI | Upper CI | min    | max    |
|---------------------------------------|----------|------------|---------|----------|----------|----------|--------|--------|
| (Intercept)                           | -1.322   | 0.298      | -4.432  | 0.000    | -1.922   | -0.768   | -1.448 | -1.237 |
| Condition threatening                 | -0.099   | 0.139      | -0.718  | 0.473    | -0.386   | 0.165    | -0.133 | -0.051 |
| Audio Natural                         | -0.047   | 0.137      | -0.342  | 0.732    | -0.313   | 0.218    | -0.099 | -0.018 |
| age                                   | 0.024    | 0.042      | 0.571   | 0.568    | -0.055   | 0.105    | 0.012  | 0.041  |
| sexm                                  | -0.239   | 0.256      | -0.934  | 0.350    | -0.784   | 0.264    | -0.310 | -0.166 |
| Session Session 2                     | 0.429    | 0.106      | 4.039   | 0.000    | 0.216    | 0.644    | 0.398  | 0.458  |
| stimulus_id D1                        | 0.009    | 0.104      | 0.084   | 0.933    | -0.219   | 0.224    | -0.026 | 0.045  |
| Condition threatening : audio natural | -0.497   | 0.214      | -2.320  | 0.020    | -0.907   | -0.085   | -0.580 | -0.433 |

Conditional R2: 0.352

Marginal R2: 0.058

**Table S11** – Results for the model Sniffing the environment.

|             | df | AIC      | LRT    | Pr(Chi) |
|-------------|----|----------|--------|---------|
| <none>      | NA | 2698.608 | NA     | NA      |
| condition   | 1  | 2706.682 | 10.074 | 0.002   |
| audio       | 1  | 2698.023 | 1.415  | 0.234   |
| age         | 1  | 2699.469 | 2.861  | 0.091   |
| sex         | 1  | 2700.127 | 3.519  | 0.061   |
| Session     | 1  | 2699.967 | 3.359  | 0.067   |
| stimulus_id | 1  | 2696.615 | 0.007  | 0.932   |

|                       | Estimate | Std. Error | value  | Lower CI | Upper CI | min    | max    |
|-----------------------|----------|------------|--------|----------|----------|--------|--------|
| (Intercept)           | 0.475    | 0.154      | 3.077  | 0.177    | 0.773    | 0.391  | 0.524  |
| condition threatening | -0.227   | 0.072      | -3.176 | -0.370   | -0.085   | -0.239 | -0.200 |
| Audio Natural         | -0.085   | 0.072      | -1.187 | -0.218   | 0.058    | -0.125 | -0.041 |
| age                   | -0.035   | 0.021      | -1.667 | -0.075   | 0.006    | -0.039 | -0.023 |
| sexm                  | 0.239    | 0.129      | 1.854  | -0.008   | 0.493    | 0.176  | 0.276  |
| Session Session 2     | 0.131    | 0.072      | 1.830  | -0.004   | 0.269    | 0.078  | 0.165  |
| stimulus_id D1        | -0.006   | 0.072      | -0.085 | -0.140   | 0.133    | -0.037 | 0.036  |

Conditional R2: 0.152

Marginal R2: 0.035

**Table S12** – Results for the model Head Turn.

|             | Df | AIC      | LRT   | Pr(>Chi) |
|-------------|----|----------|-------|----------|
| <none>      | NA | 1605.479 | NA    | NA       |
| Condition   | 1  | 1606.845 | 3.366 | 0.067    |
| audio       | 1  | 1604.655 | 1.175 | 0.278    |
| age         | 1  | 1605.757 | 2.278 | 0.131    |
| sex         | 1  | 1605.354 | 1.875 | 0.171    |
| Session     | 1  | 1612.800 | 9.321 | 0.002    |
| stimulus_id | 1  | 1603.877 | 0.398 | 0.528    |

|                       | Estimate | Std. Error | value  | Pr(> z ) | Lower CI | Upper CI | min    | max    |
|-----------------------|----------|------------|--------|----------|----------|----------|--------|--------|
| (Intercept)           | -0.233   | 0.154      | -1.516 | 0.130    | -0.528   | 0.064    | -0.280 | -0.165 |
| Condition threatening | -0.170   | 0.093      | -1.831 | 0.067    | -0.348   | 0.022    | -0.204 | -0.135 |
| Audio Natural         | -0.101   | 0.093      | -1.083 | 0.279    | -0.285   | 0.076    | -0.117 | -0.081 |
| age                   | -0.030   | 0.020      | -1.523 | 0.128    | -0.071   | 0.008    | -0.037 | -0.025 |
| sexm                  | -0.164   | 0.120      | -1.373 | 0.170    | -0.404   | 0.084    | -0.200 | -0.116 |
| Session Session 2     | -0.285   | 0.094      | -3.038 | 0.002    | -0.461   | -0.103   | -0.308 | -0.262 |
| stimulus_id D1        | 0.059    | 0.093      | 0.631  | 0.528    | -0.127   | 0.244    | 0.029  | 0.081  |

Conditional R2: 0.096

Marginal R2: 0.037

**Table S13** – Results for the model AD137 – Nose Lick

|           | Df | AIC     | LRT   | Pr(>Chi) |
|-----------|----|---------|-------|----------|
| <none>    | NA | 325.063 | NA    | NA       |
| condition | 1  | 331.758 | 8.695 | 0.003    |

|             |   |         |       |       |
|-------------|---|---------|-------|-------|
| audio       | 1 | 323.274 | 0.211 | 0.646 |
| age         | 1 | 323.533 | 0.470 | 0.493 |
| sex         | 1 | 324.216 | 1.153 | 0.283 |
| Session     | 1 | 323.642 | 0.579 | 0.447 |
| stimulus_id | 1 | 328.425 | 5.362 | 0.021 |

|                       | Estimate | Std. Error | value  | Pr(> z ) | Lower CI | Upper CI |
|-----------------------|----------|------------|--------|----------|----------|----------|
| (Intercept)           | -4.200   | 0.673      | -6.237 | 0.000    | -5.733   | -3.031   |
| condition threatening | -0.949   | 0.340      | -2.792 | 0.005    | -1.796   | -0.306   |
| Audio Natural         | 0.140    | 0.306      | 0.459  | 0.646    | -0.503   | 0.762    |
| age                   | 0.055    | 0.080      | 0.689  | 0.491    | -0.110   | 0.209    |
| sexm                  | 0.517    | 0.477      | 1.085  | 0.278    | -0.476   | 1.478    |
| Session Session 2     | -0.233   | 0.307      | -0.758 | 0.448    | -0.888   | 0.380    |
| stimulus_id D1        | 0.730    | 0.326      | 2.241  | 0.025    | 0.099    | 1.449    |

Conditional R2: 0.312

Marginal R2: 0.086

**Table S14** – Results for the model AD37 – Lip wipe

|             | Df | AIC     | LRT   | Pr(>Chi) |
|-------------|----|---------|-------|----------|
| <none>      | NA | 323.508 | NA    | NA       |
| condition   | 1  | 330.347 | 8.839 | 0.003    |
| audio       | 1  | 321.983 | 0.475 | 0.491    |
| age         | 1  | 323.165 | 1.657 | 0.198    |
| sex         | 1  | 322.304 | 0.796 | 0.372    |
| Session     | 1  | 323.280 | 1.773 | 0.183    |
| stimulus_id | 1  | 326.783 | 5.276 | 0.022    |



|                       | Estimate | Std. Error | z-value | Pr(> z ) | Lower CI | Upper CI | min    | max    |
|-----------------------|----------|------------|---------|----------|----------|----------|--------|--------|
| (Intercept)           | -3.191   | 0.710      | -4.497  | 0.000    | -4.833   | -2.076   | -3.585 | -3.080 |
| condition threatening | -0.987   | 0.353      | -2.800  | 0.005    | -1.907   | -0.324   | -1.187 | -0.844 |
| audio Natural         | -0.216   | 0.315      | -0.687  | 0.492    | -0.831   | 0.354    | -0.397 | 0.005  |
| age                   | 0.110    | 0.086      | 1.272   | 0.204    | -0.073   | 0.284    | 0.097  | 0.135  |
| sexm                  | -0.470   | 0.538      | -0.874  | 0.382    | -1.681   | 0.514    | -0.711 | -0.337 |
| Session Session 2     | -0.422   | 0.320      | -1.316  | 0.188    | -1.157   | 0.202    | -0.707 | -0.334 |
| stimulus_id D1        | -0.745   | 0.336      | -2.217  | 0.027    | -1.450   | -0.078   | -0.911 | -0.626 |

Conditional R2: 0.360

Marginal R2: 0.105

**Table S15** – Results for the model AU27 – Yawning.

|             | Df | AIC     | LRT   | Pr(>Chi) |
|-------------|----|---------|-------|----------|
| <none>      | NA | 123.017 | NA    | NA       |
| condition   | 1  | 129.572 | 8.555 | 0.003    |
| audio       | 1  | 123.388 | 2.370 | 0.124    |
| age         | 1  | 121.080 | 0.063 | 0.802    |
| sex         | 1  | 121.328 | 0.311 | 0.577    |
| session     | 1  | 121.106 | 0.089 | 0.766    |
| stimulus_id | 1  | 121.115 | 0.098 | 0.755    |

|                      | Estimate | Std. Error | value  | Pr(> z ) | Lower CI | Upper CI | min   | max   |
|----------------------|----------|------------|--------|----------|----------|----------|-------|-------|
| (Intercept)          | -3.479   | 0.816      | -4.265 | 2E-05    | 2.814    | 4.324    | 3.318 | 3.648 |
| Conditon threatening | -2.303   | 1.049      | -2.196 | 0.0281   | 1.451    | 1.989    | 1.685 | 1.775 |

|                   |        |       |        |        |        |        |        |        |
|-------------------|--------|-------|--------|--------|--------|--------|--------|--------|
| Audio Natural     | -0.983 | 0.677 | -1.452 | 0.1464 | 0.067  | 0.601  | 0.274  | 0.383  |
| age               | -0.025 | 0.101 | -0.249 | 0.8034 | -0.165 | 0.048  | -0.083 | -0.015 |
| sexm              | 0.338  | 0.608 | 0.556  | 0.5780 | -1.247 | 0.107  | -0.679 | -0.436 |
| Session Session 2 | -0.180 | 0.606 | -0.297 | 0.7664 | -1.317 | -0.760 | -1.099 | -0.975 |
| stimulus_id D1    | 0.189  | 0.606 | 0.312  | 0.755  | -0.196 | 0.332  | 0.018  | 0.090  |

Marginal R2: 0.270

**Table S16** – Results for the model Whine.

|           | df | AIC      | LRT   | Pr(Chi) |
|-----------|----|----------|-------|---------|
| <none>    | NA | 2148.072 | NA    | NA      |
| condition | 1  | 2150.284 | 4.212 | 0.040   |
| audio     | 1  | 2151.237 | 5.165 | 0.023   |
| age       | 1  | 2150.522 | 4.450 | 0.035   |
| sex       | 1  | 2148.626 | 2.555 | 0.110   |
| sesssion  | 1  | 2146.284 | 0.212 | 0.645   |

|                       | Estimate | Std. Error | t-value | Lower CI | Upper CI | min    | max    |
|-----------------------|----------|------------|---------|----------|----------|--------|--------|
| (Intercept)           | -0.222   | 0.189      | -1.181  | -0.605   | 0.131    | -0.288 | 0.058  |
| Condition threatening | -0.103   | 0.050      | -2.050  | -0.199   | -0.011   | -0.110 | -0.081 |
| Audio Normal          | 0.115    | 0.050      | 2.271   | 0.023    | 0.212    | 0.049  | 0.141  |
| age                   | 0.058    | 0.028      | 2.094   | 0.005    | 0.112    | 0.014  | 0.073  |
| sexm                  | 0.268    | 0.171      | 1.573   | -0.082   | 0.597    | 0.106  | 0.309  |
| Session Session 2     | -0.023   | 0.050      | -0.459  | -0.126   | 0.074    | -0.056 | -0.006 |
| stimulus_id D1        | 0.057    | 0.050      | 1.137   | -0.044   | 0.154    | 0.014  | 0.068  |

Conditional R2: 0.428

Marginal R2: 0.054

**Table S17** – Results for the model AD126 - Panting

|             | df | AIC      | LRT   | Pr(Chi) |
|-------------|----|----------|-------|---------|
| <none>      | NA | -853.836 | NA    | NA      |
| condition   | 1  | -852.209 | 3.627 | 0.057   |
| audio       | 1  | -855.618 | 0.218 | 0.641   |
| age         | 1  | -855.810 | 0.026 | 0.873   |
| sex         | 1  | -854.500 | 1.336 | 0.248   |
| session     | 1  | -853.765 | 2.071 | 0.150   |
| stimulus_id | 1  | -853.828 | 2.007 | 0.156   |

|                       | Estimate | Std. Error | t-value | Lower CI | Upper CI | min    | max    |
|-----------------------|----------|------------|---------|----------|----------|--------|--------|
| (Intercept)           | 0.023    | 0.023      | 0.996   | -0.020   | 0.066    | 0.010  | 0.032  |
| condition threatening | -0.018   | 0.010      | -1.902  | -0.036   | 0.002    | -0.021 | -0.014 |
| Audio Normal          | -0.004   | 0.010      | -0.466  | -0.022   | 0.014    | -0.009 | -0.002 |
| age                   | 0.001    | 0.003      | 0.155   | -0.006   | 0.006    | -0.001 | 0.001  |
| sexm                  | 0.023    | 0.020      | 1.131   | -0.017   | 0.059    | 0.009  | 0.027  |
| Session Session2      | 0.014    | 0.010      | 1.436   | -0.005   | 0.032    | 0.000  | 0.019  |
| stimulus_id D1        | -0.013   | 0.010      | -1.414  | -0.034   | 0.005    | -0.016 | -0.007 |

Conditional R2: 0.183

Marginal R2: 0.012
